# **Skeletal muscles that actuate sexual displays are specialized for *de novo* androgen synthesis**

Eric R. Schuppe<sup>1</sup>, Franz Goller<sup>2,3</sup>, and Matthew J. Fuxjager<sup>1,4\*</sup>

<sup>1</sup> Department of Biology, Wake Forest University, 455 Vine Street, Winston-Salem, NC 27101

<sup>2</sup> Department of Biology, University of Utah

<sup>3</sup> Institute for Zoophysiology, University of Münster, Germany

<sup>4</sup> Current address: Department of Ecology and Evolutionary Biology, Brown University, Providence, RI

*\*Corresponding Author*

Email: [matthew\\_fuxjager@brown.edu](mailto:matthew_fuxjager@brown.edu)

Key words: steroid synthesis, androgens, skeletal muscle, display, sexual selection

# 1    **Abstract**

2            The gonads (testes) act as the primary organ where androgenic hormones are  
3    made to regulate reproductive behavior in male vertebrates. Yet many endocrinologists  
4    have also long suspected that other tissues in the body can autonomously synthesize their  
5    own androgens to support behavioral output. We examine this idea here by studying  
6    whether avian skeletal muscles that actuate elaborate socio-sexual displays are  
7    specialized to maintain the molecular machinery otherwise needed for de novo androgen  
8    synthesis. Our results show that the vocal organ, or syrinx (SYR), of two songbirds  
9    species does in fact express all transporters and enzymes necessary to create androgenic  
10   hormones from scratch. This includes genes that encode proteins to mediate rate-limiting  
11   steps of steroidogenesis, which are seldom found outside of the gonads. We also show  
12   that expression levels of these genes are far greater in the SYR than non-display muscles,  
13   matching expression levels found in another extra-gonadal site of steroidogenesis—the  
14   brain. Furthermore, we uncover a nearly identical gene expression signature in a  
15   woodpecker neck muscle, the *longus colli ventralis* (LC). This tissue actuates the bird’s  
16   social drum display, which serves the same functions as song. This same study also  
17   demonstrates that the elevated expression of steroidogenic genes persists in this neck  
18   muscle year-round, suggesting that the LC’s capacity to make androgens is a constitutive  
19   trait. Altogether, our findings suggest that muscles involved in sexual display is uniquely  
20   specialized to locally make steroid hormones, likely supporting their own role in  
21   behavioral production.

22

## 23 INTRODUCTION

24 Androgenic hormones play a vital role in the regulation of male reproductive  
 25 behavior, including most forms of courtship and male-male competition [1].  
 26 Conventional wisdom says that the gonads (testes) mediate these effects, given that they  
 27 synthesize androgenic steroids *de novo* and release them into circulation [2, 3]. Yet, the  
 28 dependency of reproductive behavior on the gonads may be more complex than this  
 29 model suggests. Many species, for example, express androgen-dependent behavioral  
 30 traits at times when the testes are fully regressed and incapable of producing steroids [4-  
 31 8]. Such results imply that androgen synthesis may occur in other tissues throughout the  
 32 vertebrate body, locally fueling steroidal modulation of behavioral output. Although this  
 33 idea provides an intriguing way to conceptualize how behavior can be adaptively  
 34 decoupled from testicular functioning [9, 10], our understanding of where extra-gonadal  
 35 androgen synthesis occurs and how it is specialized to support sexual traits remains  
 36 largely unclear.

37 Here we explore these topics by assessing mechanisms of *de novo* androgen  
 38 synthesis in skeletal muscles that support elaborate socio-sexual behavior. Skeletal  
 39 muscle is a major androgen target in the vertebrate body [11-13], and prior work shows  
 40 that androgenic regulation of muscle is often necessary for reproduction [14-16].  
 41 Courtship is a prime example: muscles that mediate displays used to attract mates are  
 42 often enriched with androgen receptor [13, 17, 18], and blocking androgenic activation of  
 43 these receptors disrupts the effectiveness or recognizability of signaling behavior [14-16].  
 44 Importantly, however, we know that individuals can often produce these same displays  
 45 when their gonads are not making steroids [4, 5, 19]. Tissues other than the testes may

46 therefore act as the source of androgens to regulate how muscle governs behavioral  
47 outflow. One potential site of androgen synthesis is the display muscle itself—that is,  
48 myocytes may make their own androgens to locally influence their ability to control  
49 behavior. Yet we know little about the capacity of skeletal muscles to create its own  
50 androgens, making this hypothesis difficult to assess.

51         One of the best ways to examine whether a given tissue can make its own steroid  
52 hormones *de novo* is to measure how it expresses the transporters and enzymes that make  
53 up the steroid biosynthesis pathway [Figure 1; 20, 21, 22]. Indeed, there are only a few  
54 tissues other than the gonads that readily express these genes—namely, skin, heart, and  
55 brain [22-24]. Most other tissues in vertebrates lack key transporters and enzymes that  
56 mediate steroid biosynthesis, particularly the rate-limiting step of this process where  
57 cholesterol is brought into the mitochondria and converted to the steroid hormone  
58 precursor, pregnanolone [25-27]. Accordingly, if selection drives the evolution of *de*  
59 *novo* androgen synthesis in displays muscles, then these tissues should express the rate-  
60 limiting transporters and enzymes that facilitate this important first steroid of  
61 steroidogenesis as well as the remaining enzymes that metabolize pregnanolone into  
62 testosterone. Moreover, if muscles are specialized to do this, then we also expect that  
63 they express the genes more abundantly than muscles not involved in display production.  
64 In fact, such expression should be on par with other extra-gonadal sites of *de novo* steroid  
65 synthesis, like the brain [22, 28].

66         We test these predictions in three different bird species: white-breasted nuthatches  
67 (*Sitta carolinensis*), zebra finches (*Taeniopygia guttata*), and downy woodpeckers  
68 (*Dryobates pubescens*). The first reason that these taxa are ideal to study muscular

androgen synthesis is that they each produce an elaborate socio-sexual display that depends on androgen-muscle interactions. Nuthatches and zebra finches, for example, court mates and compete with rivals by singing [29, 30]. This behavior is controlled by a vocal organ called the syrinx (SYR), which is composed of several muscles that sit on the tracheo-bronchial junction [31]. Neural activation of this musculature shapes the spectral features of song [32], and studies show that androgenic hormones fine tune this process by acting directly on androgen receptors in SYR muscle [11, 15]. On the other hand, downy woodpeckers signal to conspecifics during territorial contests by drumming their bill on trees at speeds averaging 16 beats/sec [33]. Such behavior is mediated by a neck muscle called the *longus colli ventralis* (LC) [34], and recent work shows that androgens likely act on it to help support the performance of drumming behavior [35]. The second reason why these three species are ideal for the proposed work is that they all are known to produce their respective displays when circulating androgens levels are basal, including periods of non-breeding [5, 30, 36]. We therefore test whether the SYR and LC muscles of these birds not only express the necessary machinery for *de novo* androgen synthesis, but also whether these tissues are specialized for such endocrine functionality.

85

## 86 **RESULTS**

### 87 *Muscular expression of steroid biosynthesis enzymes*

88 We first tested whether display muscles express the necessary transporters and  
89 enzymes for *de novo* androgen synthesis. Using reverse transcription PCR, we assayed  
90 the presence of transcripts for these proteins in both the white-breasted nuthatch SYR and  
91 downy woodpecker LC. Our data showed that all these transcripts were present in both

display muscles, although some were expressed at very low levels (Figure S1). We also included testes in these PCR reactions as a positive control, verifying our primers and their efficacy in the PCR reactions. Overall, our data indicate that all transporters and enzymes needed to turn cholesterol into an androgenic ligand (see Figure 1) are present in both the nuthatch SYR and the woodpecker LC.

### *Specializations in the capacity for de novo androgen synthesis in the syrinx*

Next, we explored whether the machinery for *de novo* androgen synthesis is specialized in display muscle. To do this, we used real-time quantitative PCR (qPCR) to compare relative expression of androgen biosynthesis genes among the (i) gonad (testis), which are the main site of androgen synthesis; (ii) brain, which is a known site of extragonadal androgen synthesis; (iii) SYR and/or LC display muscles, and (iv) *pectoralis* muscle (PEC), a large non-display muscle that powers locomotion in these species.

In both nuthatches and zebra finches, we found significant differences among tissues in the expression of nearly all androgen biosynthesis genes (Figure VI-3A and B; Table VI-1). The one exception was zebra finch TPSO, which was highly expressed in every tissue. *Post-hoc* analyses of these main effects showed that gonads have the highest expression of each gene. At the same time, our findings also highlighted that SYR muscle expresses these genes at similar levels to the brain, another extragonadal site of *de novo* steroid synthesis [22]. Gene expression levels in SYR muscle were also significantly greater than in a non-display muscle, the PEC (Figure VI-3A and B; Table VI-1). Only cytochrome p450 17 (cyp17, or steroid 17 $\alpha$ -monooxygenase) showed an expression profile in SYR that was lower than in the brain and equal to the PEC. Cyp17 converts

progesterins to androgens [37], its abundance is unlikely to limit the tissue's capacity for androgen synthesis.

Perhaps the most important result of this analysis is that expression patterning described above applies to both steroidogenic acute regulatory protein (StAR) and cytochrome p450 family 11 (cyp11a1, or side chain cleavage enzyme). These gene products mediate the rate-limiting steps of steroidogenesis—StAR transports cholesterol from the outer mitochondrial membrane to the inner membrane [38], while side chain cleavage enzymatically converts cholesterol to pregnanolone [37]. Most extra-gonadal tissues fail to express either of these genes, rendering them incapable of *de novo* steroid synthesis [25-27]. Thus, display muscle is unique in this regard, as it expresses relatively high levels of these genes to likely initiate the process of steroidogenesis.

One of the marked species differences in the SYR is that the nuthatch expresses aromatase, while the zebra finch does not (Figure 2A and B; Table 1). Aromatase converts the androgen testosterone to estradiol, meaning that these species likely differ in the amount of estrogens that the SYR can make. To date, most work suggests that estrogens play little role in the regulation of the SYR; yet, these results suggest that this may not be the case for all birds. Notably, both the nuthatch and zebra finch SYR express 5 $\alpha$ -reductase, which converts testosterone to a more potent androgenic ligand (dihydrotestosterone).

### *Steroid biosynthesis in the woodpecker neck muscle*

In a second experiment, we explored the expression profile of these same androgen biosynthesis genes in the downy woodpecker neck muscle, the LC [39]. This tissue actuates the birds drum display, which is functionally similar to birdsong but produced through hammering the bill against a tree (and not via the SYR). We find that LC muscle expresses all transporters and enzymes necessary for androgen biosynthesis, including the transcripts for both StAR and side chain cleavage (Figure 2C; Table 1). Moreover, each gene is more abundantly expressed in the LC than in the PEC (non-display muscle). The one exception to this pattern is *cyp17*, whose expression levels are indistinguishable between the two muscles (Figure 2C; Table 1). Importantly, this difference between the LC and PEC may be associated specifically with drumming in woodpeckers, as no such difference in gene expression profile was present between these two muscles in the nuthatch.

Meanwhile, in the downy woodpecker, transcript levels are typically lower in the LC and PEC, compared to both the brain and gonad. Expression of StAR is not consistent with this trend, since its expression is similar between LC and brain. Nonetheless, our data collectively point to the woodpecker LC as a muscle that maintains a specialized capacity for *de novo* androgen synthesis.

### *Constitutive vs. plastic regulation of enzyme expression*

In a final analysis, we investigated whether muscular expression of androgen biosynthesis enzymes are linked to muscle use *per se* [40]. We therefore compared expression of these genes in the woodpecker LC between the breeding season and non-



breeding season. Downy woodpeckers drum far more frequently during the breeding season, although they do produce occasional drums in the non-breeding season [36]. Thus, if expression of steroid biosynthesis enzymes were associated with display related muscle use, we would expect a strong seasonality in their expression level. Our data did not support this hypothesis, in that expression levels of all androgen biosynthesis genes were indistinguishable between the breeding and non-breeding seasons. We even confirmed that this assay for seasonal variation in gene expression was robust by comparing gonads from these same birds (Figure 3; Table 2). Indeed, when the testes of these individuals produce testosterone in the spring, all androgen biosynthesis genes are more abundantly expressed than during the winter when the gonads are regressed. These data are therefore consistent with a model in which muscle “activity” does not guide the expression of the steroid biosynthesis machinery in the myocyte.

## DISCUSSION

Androgenic steroids can act via skeletal muscle to mediate many elaborate social displays that animals use for courtship and competition [29, 30, 33]. Our current study uncovers an important new dimension to this process by showing that select muscles that govern such behavior are likely specialized for *de novo* androgen synthesis. This means that the muscle can make its own androgenic hormones, and thus allow steroidal regulation to occur outside the confines of the hypothalamic-pituitary-gonadal (HPG) axis. We provide several lines of evidence to support this idea. First, two different display muscles—the songbird SYR and the woodpecker LC—express all the transporters and enzymes necessary to convert cholesterol into bioactive androgens. This includes the

expression of the genes that encode StAR and side-chain cleavage, which underlie the rate-limiting steps of steroid biosynthesis [37] and are typically absent in extra-gonadal tissue [25-27]. Second, expression levels of these genes are relatively greater in display muscles compared to a non-display muscle, and they even match levels in the brain (a known sites of steroid synthesis outside of the gonads). Lastly, the abundance of transcripts for genes involved in steroidogenesis are stable in display muscle across the year. This stands in contrast to the gonads, where transcript levels drop during the non-breeding seasons when circulating androgens are not made. Thus, the capacity of display muscle to make its own androgens is likely a constitutive property of the tissue itself, failing to change in response to fluctuations in circulating testosterone or behavior-related muscle activity [35].

### *Functional significance*

To our knowledge, our study is the first to indicate that skeletal muscle maintains the molecular machinery necessary for *de novo* androgen synthesis. Moreover, this study is also the first to suggest that this capacity is specialized specifically in muscles that actuate elaborate sexual displays. Thus, given the importance of androgen-muscle interactions to these behaviors, we hypothesize that myocytic synthesis of androgenic steroids supports fine motor control of movements that underlie effective communication. There are several ways in which these effects might occur. For example, androgens might act via the SYR to increase its muscle mass [11], enhance its capacity for neuromuscular transmission [41, 42], modulate its fiber type composition [43, 44], and/or calcium cycling machinery [45]. Such changes boost force production and the speed of muscle

contraction, and thus facilitate rapid temporal features of song [44, 46]. Several of these acoustic parameters—including the on- and offset of vocalizations, rapid modulation of sound frequency and amplitude, as well as the rapid switching between contributions of the two sound generators—likely play a critical role in how a male’s singing ability is assessed by same- and opposite-sex conspecifics [47-49]. At the same time, it is possible that androgenic modulation of the rapid movement of the sound producing labia into the airstream lowers the required pressure for sound onset, which in turn leads to louder vocalizations [50] that enhance the potency of song [51, 52]. Past work certainly supports this view, showing that androgenic regulation of the SYR mediates several important acoustic elements of song, but not the motivation to produce it. For example, if androgen action in the SYR of canaries (*Serinus canaria*) is selectively blocked, then males produce songs with a disrupted syllable morphology and substantially reduced performance of ‘special trills’ [15]. This latter component to the display stimulates female copulation solicitation displays more than any other [53], suggesting that androgen-SYR interactions are vital to a male’s ability to copulate.

Many of these same principles also likely apply to the woodpecker LC. This muscle helps actuate the swift hammering behavior of the drum display [34, 54], meaning that the tissue must repeatedly contract and relax at an especially rapid rate [up to 20 Hz; 33]. Recent work shows that the LC is in fact specialized for this role, expressing high levels of genes that encode proteins to mediate quick calcium buffering and reuptake [55]. This should result in rapid muscle relaxation, which in turn increases contraction-relaxation cycling speeds. One way to maintain such machinery is through androgenic action, which regulates genes linked to calcium cycling in the myocyte [56, 57]. The

woodpecker LC is likely no exception, given that it is heavily enriched with androgen receptor [35]. Thus, local synthesis of androgens in this muscle probably supports its ability to generate a fast drum, which is more effective during territorial combat [33]. Precedent for this idea comes from experimental work in a species of tropical bird, called the golden-collared manakin (*Manacus vitellinus*). In this species, androgens act on the wing musculature to dramatically increase the speed at which males perform acrobatic courtship displays [14, 58]. Females preferentially mate with faster displaying males, meaning that sexual selection for rapid display behavior likely drives the evolution of androgenic regulation of the wing muscles [59].

In light of our hypotheses about the function of *de novo* androgen synthesis in display muscle, we must also point out that these tissues express steroidogenic gene transcripts at levels roughly 1-5% of those in the gonads. These levels may at first seem low; however, we find that they are similar to those found in the brain, which is a known site of steroid synthesis [22, 60, 61]. Moreover, evidence suggests that cardiomyocytes express similarly low levels of steroidogenic enzymes relative to the testes [62], yet the cells are still fully capable of producing functional steroids *de novo* [24, 63]. It is therefore likely that display muscle—despite expressing low levels of the genes involved in steroidogenesis—can produce fully functional androgens.

### *Evolutionary Significance*

Why might display musculature evolve the capacity to synthesize androgens in the first place? One reason might be that it helps individuals temporally liberate their display behavior from functional barriers set by the hypothalamic-pituitary-gonadal axis.

Most seasonally breeding individuals increase levels of circulating androgens at the onset of the reproductive season, particularly when males compete for resources and/or mates [64]. Thus, if this was the primary source of androgens to mediate display behavior by way of the muscle, then individuals could only display during these times of the year. Yet it is well established that several species readily perform socio-sexual signals outside of this narrow context —indeed, this ability is often adaptive [7, 8, 19, 65]. This is no exception for the species we examine herein, as all three sing or drum when circulating levels of androgens are otherwise basal [5, 30, 36]. Thus, the ability of the SYR and LC to make their own androgens likely allows individuals of each species to maintain the peripheral components of their display motor systems year-round. In this way, they would be capable of producing effective signals regardless of androgen levels in the blood, as long as the brain could still initiate such behavior (see below).

Androgen synthesis in display muscle may also help mitigate fitness ‘costs’ normally associated with these hormones. Indeed, gonadal androgens suppress immune function, diminish fat reserves, and slow the process of wound healing [66-68]. Prolonged exposure to circulating androgens outside periods of territoriality and/or breeding also interferes with parental care [69]. All these effects negatively impact viability and reproductive success [70, 71], and thus selection favors mechanisms that reduce or offset their impact. As such, low-levels of androgenic synthesis in the target muscles likely provides a solution to this ‘evolutionary problem’ by allowing the performance of the androgen-dependent behavior without high levels of circulating androgens [72].

## *A new dimension to androgen-muscle relationships*

Our data stress the potential importance of androgenic regulation of muscle involved in complex animal behavior, a view currently gaining acceptance [73]. However, these findings should not detract from the long-held view that circulating androgens are critical to the organization and activation of many sexual behaviors. Both of these models likely apply to most vertebrates, and it is the integration of these two viewpoints that forwards our thinking about how steroid systems accommodate reproductive traits. Accordingly, we hypothesize that circulating brain-level androgen action helps regulate facets of reproductive behavior related to sensory integration, arousal, motivation, and/or attention [74]. By contrast, we expect that androgens act through muscle to mediate performance-related aspects of behavior, such as agility, speed, endurance, etc. [75]. In this way, both “top down” and “bottom up” channels of steroid action are necessary to fully actuate certain behavioral traits. Our current findings therefore suggest that such channels are not necessarily coupled to the same hormonal source (i.e., HPG axis), rendering the hormonal mechanisms far more labile—both mechanistically and evolutionarily—than previously thought.

## *Conclusions*

Here, we find that important display muscles in three different avian species maintain the machinery needed to undergo *de novo* androgen synthesis. This trait appears to be a constitutive specialization of the muscle itself, resembling a similar specialization of the brain for the ability to produce its own steroid. We hypothesize that androgen synthesis in display muscle is essential for maintaining its ability to actuate necessary

signaling behavior outside of the breeding season, and thus is an adaptation to enhance social communication behavior.

## **METHODS**

### *Animals*

All appropriate federal, state, and university authorities approved of the methods described below. During March and April, we passively captured male downy woodpeckers ( $n=4$ ) and white-breasted nuthatches ( $n=3$ ) using mist nets in the woodlands of Forsyth County, North Carolina (USA). Individuals were immediately euthanized via cervical dislocation to keep the LC muscle intact and flash frozen on dry ice. We stored specimens at  $-80^{\circ}\text{C}$  until they were later processed, at which point we dissected out the whole brain, gonads, SYR muscle (nuthatches only), LC muscle, and PEC muscle. During these dissections, we also verified that the gonads from each individual were enlarged to a size consistent with an actively breeding bird. During November to December of the same year, we passively captured and dissected a set of non-breeding down woodpeckers ( $n=3$ ) using the same techniques described above. We similarly verified that the testes were regressed to a size consistent with a non-breeding bird.

Finally, we euthanized adult (age  $>120$  days) male zebra finches ( $n=5$ ) with an overdose of isoflurane before dissection. The birds had been individually housed in a  $31.8\text{ cm} \times 22.9\text{ cm} \times 27.9\text{ cm}$  wire cages with newspaper lining. They were fed a mixture of red and white millet, canary seed, and water *ad libitum*, and they were supplemented with peas and corn every other day.

# *RNA extraction and reverse transcription*

We homogenized each tissue sample in TRIzol Reagent™ using a rotor/stator homogenizer set to medium speed. We extracted total RNA from these samples with a Zymo Direct-zol RNA miniprep kit (Zymo Research, Irvine, CA), in which we included an initial phenol-chloroform separation of RNA as per manufacturer instructions. Next, we treated RNA samples with DNase and reverse transcribed 1 µg of RNA, using SuperScript IV Reverse Transcriptase (Invitrogen). Each reaction occurred for 10 min at 55°C, followed by 10 min at 80°C.

# *PCR and Sequencing*

Using cDNA from the extracted tissues, we amplified the different genes that encode the proteins that mediate steroid biosynthesis (Figure S1). The primers for the initial PCR reactions were designed from either the downy woodpecker or the zebra finch genomes to conserved regions of each gene (Table S1). All PCR reactions contained 40 ng of cDNA, 0.5 µM of forward primer, 0.5 µM of reverse primer, OneTaq 2x Mastermix (New England Biology). Reactions were run at 96 °C for 5 min, followed by 40 cycles of 96°C for 30 s; 57–60 °C for 30 s; and 68°C for 30 s. Each reaction was completed with a final extension step at 68°C for 5 min.

Resulting PCR products were imaged on a 1% agarose gel to verify that fragments matched their expected size. We then purified the PCR products using a GeneJet PCR purification kit (ThermoFisher) and had them sequenced (Eton Bioscience). For *cyp11a1*, *STAR*, and *17BHSD*, resulting purified PCR products were amplified a second time using the parameters described above to generate a high enough



concentration of DNA for accurate and efficient sequencing. All PCR products matched the expected gene of interest.

### *Quantitative PCR (qPCR)*

We used quantitative real-time PCR (qPCR) to measure each steroidogenic enzyme's gene expression in the different tissues of our three species relative to GAPDH (housekeeping control). In all three species, we confirmed that GAPDH was acting as an appropriate endogenous control by verifying that there were no significant differences in between tissues in GAPDH expression (all p values >0.2). For this analysis, reactions were run in an Applied Biosystems QuantStudio3 machine. We used the gene sequences obtained from our PCR runs to generate species-specific primers (Table S2), and we ran each reaction with 100 ng of cDNA, 0.9 mM of each primer, and SYBR Green Master Mix (Applied Biosystems). For all genes, we included negative controls that consisted of all elements in the reactions described above except cDNA. Reactions were run using the following parameters: 50 °C for 2 min, 95 °C for 10 min, followed by 40 cycles of 95 °C for 15 s, and 60 °C for 1 min. We added a final dissociation stage to the end of the reaction process, which consisted of 95 °C for 15 s, 60 °C for 30 s, and finally 95 °C for 15 s. All negative controls were undetectable.

All measurable samples were detectable with CT values below 35. However, in a handful of cases, mRNA for a given gene interest was not detectable after 40 cycles (see Table S3d)—we therefore list count these tissues as not expression the gene of interest [i.e., 'not detectable' (n.d.); See Figure 3]. Reaction efficiencies were between 90% and 110%, and we used the standard curve method to measure relative expression (i.e.,

quantity of gene of interest /quantity GAPDH). The standard curves used in all the current experiments were generated serially diluted (1:4) pooled cDNA.

### *Data analysis*

To next investigate whether there are tissue differences in mRNA expression of each of the steroidogenic enzymes, we performed linear mixed models (LMM) for each species with tissue as a fixed factor. To account for the non-independence of gene expression levels between tissues in the same animal, we used individual identity as a random factor in each model. In all analyses, significant main effects were further examined with *post-hoc* comparisons, using FDR corrections to account for multiple contrasts. We used independent t-tests to determine how the capacity for steroid synthesis changed in the testis, LC muscle, and PEC muscle across seasons in downy woodpeckers. Furthermore, we performed FDR corrections to account for the number of LMMs and t-tests performed. All analyses were performed in R (v3.3.2).

**Data accessibility.** The data will be uploaded to Dryad upon acceptance of the manuscript.

**Ethics.** All the experiments in this study were conducted with approval from the Wake Forest University Institution Animal Care and Use Committee (# A16-187).

**Author contributions.** ERS participated in study design, collected the animals, performed lab experiments, analyzed data, and wrote the manuscript. FG and MJF participated in study design, analyzed data, and wrote the manuscript.

**Competing interests.** The authors have no competing interests to report.

387    **Acknowledgements.** We thank Johnny Petersen, Emma Vivlamore, and Ryan Walsh for  
388    field and laboratory assistance.

389    **Funding.** This work was funded by National Science Grant (IOS-1655730) to M.J.F.

## REFERENCES

1. Adkins-Regan E. 2005 *Hormones and animal social behavior*, Princeton University Press.
2. Phoenix C.H., Goy R.W., Young W.C. 1967 Sexual behavior: General aspects. *Neuroendocrinology* **2**, 163-196.
3. Blaustein J.D., Olster D.H. 1989 Gonadal steroid hormone receptors and social behaviors. In *Molecular and cellular basis of social behavior in vertebrates* (pp. 31-104, Springer.
4. Schlinger B.A., Barske J., Day L., Fusani L., Fuxjager M.J. 2013 Hormones and the neuromuscular control of courtship in the golden-collared manakin (*Manacus vitellinus*). *Front Neuroendocrinol* **34**(3), 143-156.
5. Dunn A.M., Zann R.A. 1996 Undirected song in wild zebra finch flocks: contexts and effects of mate removal. *Ethology* **102**(4), 529-539.
6. Moore M.C., Marler C.A. 1987 Effects of testosterone manipulations on nonbreeding season territorial aggression in free-living male lizards, *Sceloporus jarrovi*. *Gen Comp Endocrinol* **65**(2), 225-232.
7. Hau M., Stoddard S.T., Soma K.K. 2004 Territorial aggression and hormones during the non-breeding season in a tropical bird. *Horm Behav* **45**(1), 40-49.
8. Hau M., Wikelski M., Soma K.K., Wingfield J.C. 2000 Testosterone and year-round territorial aggression in a tropical bird. *Gen Comp Endocrinol* **117**(1), 20-33.
9. Soma K.K., Scotti M.-A.L., Newman A.E.M., Charlier T.D., Demas G.E. 2008 Novel mechanisms for neuroendocrine regulation of aggression. *Front Neuroendocrinol* **29**(4), 476-489.
10. Saldanha C.J., Remage-Healey L., Schlinger B.A. 2011 Synaptocrine signaling: steroid synthesis and action at the synapse. *Endocr Rev* **32**(4), 532-549.
11. Veney S.L., Wade J. 2004 Steroid receptors in the adult zebra finch syrinx: a sex difference in androgen receptor mRNA, minimal expression of estrogen receptor  $\alpha$  and aromatase. *Gen Comp Endocrinol* **136**(2), 192-199.
12. Feng N.Y., Katz A., Day L.B., Barske J., Schlinger B.A. 2010 Limb muscles are androgen targets in an acrobatic tropical bird. *Endocrinology* **151**(3), 1042-1049.
13. Mangiamale L.A., Fuxjager M.J., Schuppe E.R., Taylor R.S., Hödl W., Preininger D. 2016 Increased androgenic sensitivity in the hind limb muscular system marks the evolution of a derived gestural display. *Proc Natl Acad Sci U S A* **113**(20), 5664-5669.
14. Fuxjager M.J., Longpre K.M., Chew J.G., Fusani L., Schlinger B.A. 2013 Peripheral androgen receptors sustain the acrobatics and fine motor skill of elaborate male courtship. *Endocrinology* **154**(9), 3168-3177.
15. Alward B.A., Madison F.N., Gravley W.T., Ball G.F. 2016 Antagonism of syringeal androgen receptors reduces the quality of female-preferred male song in canaries. *Anim Behav* **119**, 201-212.
16. Yong L., Thet Z., Zhu Y. 2017 Genetic editing of the androgen receptor contributes to impaired male courtship behavior in zebrafish. *J Exp Biol* **220**(17), 3017-3021.
17. Johnson M.A., Kircher B.K., Castro D.J. 2018 The evolution of androgen receptor expression and behavior in Anolis lizard forelimb muscles. *Journal of Comparative Physiology A* **204**(1), 71-79.

18. Fuxjager M.J., Eaton J., Lindsay W.R., Salwiczek L.H., Rensel M.A., Barske J., Sorenson L., Day L.B., Schlinger B.A. 2015 Evolutionary patterns of adaptive acrobatics and physical performance predict expression profiles of androgen receptor—but not oestrogen receptor—in the forelimb musculature. *Funct Ecol* **29**(9), 1197-1208.
19. Jenssen T.A., Greenberg N., Hovde K.A. 1995 Behavioral profile of free-ranging male lizards, *Anolis carolinensis*, across breeding and post-breeding seasons. *Herpetol Monogr*, 41-62.
20. Taves M.D., Plumb A.W., Sandkam B.A., Ma C., Van Der Gugten J.G., Holmes D.T., Close D.A., Abraham N., Soma K.K. 2014 Steroid profiling reveals widespread local regulation of glucocorticoid levels during mouse development. *Endocrinology* **156**(2), 511-522.
21. Tobiansky D.J., Korol A.M., Ma C., Hamden J.E., Jalabert C., Tamm R.J., Soma K.K. 2017 Testosterone and corticosterone in the mesocorticolimbic system of male rats: effects of gonadectomy and caloric restriction. *Endocrinology* **159**(1), 450-464.
22. London S.E., Monks D.A., Wade J., Schlinger B.A. 2006 Widespread capacity for steroid synthesis in the avian brain and song system. *Endocrinology* **147**(12), 5975-5987.
23. Cirillo N., Prime S.S. 2011 Keratinocytes synthesize and activate cortisol. *Journal of cellular biochemistry* **112**(6), 1499-1505.
24. Takeda Y., Miyamori I., Yoneda T., Iki K., Hatakeyama H., Blair I.A., Hsieh F.Y., Takeda R. 1994 Synthesis of corticosterone in the vascular wall. *Endocrinology* **135**(5), 2283-2286.
25. Endo D., Kanaho Y.-I., Park M.K. 2008 Expression of sex steroid hormone-related genes in the embryo of the leopard gecko. *Gen Comp Endocrinol* **155**(1), 70-78.
26. Kusakabe M., Zuccarelli M.D., Nakamura I., Young G. 2009 Steroidogenic acute regulatory protein in white sturgeon (*Acipenser transmontanus*): cDNA cloning, sites of expression and transcript abundance in corticosteroidogenic tissue after an acute stressor. *Gen Comp Endocrinol* **162**(2), 233-240.
27. Goetz F.W., Norberg B., McCauley L.A.R., Iliev D.B. 2004 Characterization of the cod (*Gadus morhua*) steroidogenic acute regulatory protein (StAR) sheds light on StAR gene structure in fish. *Comparative Biochemistry and Physiology Part B: Biochemistry and Molecular Biology* **137**(3), 351-362.
28. Kimoto T., Ishii H., Higo S., Hojo Y., Kawato S. 2010 Semicomprehensive analysis of the postnatal age-related changes in the mRNA expression of sex steroidogenic enzymes and sex steroid receptors in the male rat hippocampus. *Endocrinology* **151**(12), 5795-5806.
29. Nowicki S., Searcy W.A. 2004 Song function and the evolution of female preferences: why birds sing, why brains matter. *Ann N Y Acad Sci* **1016**(1), 704-723.
30. Kilham L. 1972 Reproductive behavior of white-breasted nuthatches II. Courtship. *The Auk* **89**(1), 115-129.
31. Goller F., Cooper B.G. 2004 Peripheral motor dynamics of song production in the zebra finch. *Ann N Y Acad Sci* **1016**(1), 130-152.
32. Vicario D.S., Nottebohm F. 1988 Organization of the zebra finch song control system: I. Representation of syringeal muscles in the hypoglossal nucleus. *J Comp Neurol* **271**(3), 346-354.
33. Schuppe E.R., Fuxjager M.J. 2018 High - speed displays encoding motor skill trigger elevated territorial aggression in downy woodpeckers. *Funct Ecol* **32**(2), 450-460.

34. Kaiser M. 1990 Untersuchungen zur Biomechanik des Balztrommels der Specte (Picidae). *Beitr Vogelkd* **36**, 129-159.
35. Schuppe E.R., Fuxjager M.J. In revision Phenotypic variation reveals sites of evolutionary constraint in the androgenic signaling pathway. *Horm Behav*.
36. Kilham L. 1962 Reproductive behavior of downy woodpeckers. *The condor* **64**(2), 126-133.
37. Hanukoglu I. 1992 Steroidogenic enzymes: structure, function, and role in regulation of steroid hormone biosynthesis. *The Journal of steroid biochemistry and molecular biology* **43**(8), 779-804.
38. Kallen C.B., Billheimer J.T., Summers S.A., Stayrook S.E., Lewis M., Strauss J.F. 1998 Steroidogenic acute regulatory protein (StAR) is a sterol transfer protein. *J Biol Chem* **273**(41), 26285-26288.
39. van der Leeuw A.H.J., Bout R.G., Zweers G.A. 2001 Control of the cranio-cervical system during feeding in birds. *Am Zool* **41**(6), 1352-1363.
40. Aizawa K., Iemitsu M., Otsuki T., Maeda S., Miyauchi T., Mesaki N. 2008 Sex differences in steroidogenesis in skeletal muscle following a single bout of exercise in rats. *J Appl Physiol*.
41. Luine V., Nottebohm F., Harding C., McEwen B.S. 1980 Androgen affects cholinergic enzymes in syringeal motor neurons and muscle. *Brain Res* **192**(1), 89-107.
42. Bleisch W., Luine V.N., Nottebohm F. 1984 Modification of synapses in androgen-sensitive muscle. I. Hormonal regulation of acetylcholine receptor number in the songbird syrinx. *J Neurosci* **4**(3), 786-792.
43. Holmes M.M., Bartrem C.L., Wade J. 2007 Androgen dependent seasonal changes in muscle fiber type in the dewlap neuromuscular system of green anoles. *Physiol Behav* **91**(5), 601-608.
44. Uchida A.M., Meyers R.A., Cooper B.G., Goller F. 2010 Fibre architecture and song activation rates of syringeal muscles are not lateralized in the European starling. *J Exp Biol* **213**(7), 1069-1078.
45. Fuxjager M.J., Barske J., Du S., Day L.B., Schlinger B.A. 2012 Androgens regulate gene expression in avian skeletal muscles. *PLoS One* **7**(12), e51482.
46. Elemans C.P.H., Mead A.F., Rome L.C., Goller F. 2008 Superfast vocal muscles control song production in songbirds. *PLoS One* **3**(7), e2581.
47. Vallet E., Kreutzer M. 1995 Female canaries are sexually responsive to special song phrases. *Anim Behav* **49**(6), 1603-1610.
48. Vallet E., Beme I., Kreutzer M. 1998 Two-note syllables in canary songs elicit high levels of sexual display. *Anim Behav* **55**(2), 291-297.
49. Leitner S., Voigt C., Metzendorf R., Catchpole C.K. 2005 Immediate early gene (ZENK, Arc) expression in the auditory forebrain of female canaries varies in response to male song quality. *J Neurobiol* **64**(3), 275-284.
50. Mencia C., Kuberan B., Goller F. 2016 Contributions of rapid neuromuscular transmission to the fine control of acoustic parameters of birdsong. *J Neurophysiol* **117**(2), 637-645.
51. Forstmeier W., Kempenaers B., Meyer A., Leisler B. 2002 A novel song parameter correlates with extra-pair paternity and reflects male longevity. *Proc R Soc Lond B Biol Sci* **269**(1499), 1479-1485.



52. Ritschard M., Riebel K., Brumm H. 2010 Female zebra finches prefer high-amplitude song. *Anim Behav* **79**(4), 877-883.
53. Drăgănoiu T.I., Nagle L., Kreutzer M. 2002 Directional female preference for an exaggerated male trait in canary (*Serinus canarius*) song. *Proc R Soc Lond B Biol Sci* **269**(1509), 2525-2531.
54. Jenni L. 1981 Das skelettmuskelsystem des halses von buntspecht und mittelspecht *Dendrocopos major* und *medius*. *J Ornithol* **122**(1), 37-63.
55. Schuppe E.R., Petersen J.O., Fuxjager M.J. 2018 Woodpecker drumming behavior is linked to the elevated expression of genes that encode calcium handling proteins in the neck musculature. *J Exp Biol* **221**(15), jeb180190.
56. Rome L.C., Cook C., Syme D.A., Connaughton M.A., Ashley-Ross M., Klimov A., Tikunov B., Goldman Y.E. 1999 Trading force for speed: why superfast crossbridge kinetics leads to superlow forces. *Proceedings of the National Academy of Sciences* **96**(10), 5826-5831.
57. Rome L.C., Syme D.A., Hollingworth S., Lindstedt S.L., Baylor S.M. 1996 The whistle and the rattle: the design of sound producing muscles. *Proceedings of the National Academy of Sciences* **93**(15), 8095-8100.
58. Fuxjager M.J., Miles M.C., Goller F., Petersen J., Yancey J. 2017 Androgens support male acrobatic courtship behavior by enhancing muscle speed and easing the severity of its tradeoff with force. *Endocrinology* **158**(11), 4038-4046.
59. Fusani L., Day L.B., Canoine V., Reinemann D., Hernandez E., Schlinger B.A. 2007 Androgen and the elaborate courtship behavior of a tropical lekking bird. *Hormones and behavior* **51**(1), 62-68.
60. Sakamoto H., Ukena K., Tsutsui K. 2002 Dendritic spine formation in response to progesterone synthesized de novo in the developing Purkinje cell in rats. *Neurosci Lett* **322**(2), 111-115.
61. Taves M.D., Gomez-Sanchez C.E., Soma K.K. 2011 Extra-adrenal glucocorticoids and mineralocorticoids: evidence for local synthesis, regulation, and function. *American Journal of Physiology-Endocrinology and Metabolism* **301**(1), E11-E24.
62. Kayes-Wandover K.M., White P.C. 2000 Steroidogenic enzyme gene expression in the human heart. *The Journal of Clinical Endocrinology & Metabolism* **85**(7), 2519-2525.
63. Young M.J., Clyne C.D., Cole T.J., Funder J.W. 2001 Cardiac steroidogenesis in the normal and failing heart. *The Journal of Clinical Endocrinology & Metabolism* **86**(11), 5121-5126.
64. Goymann W., Landys M.M., Wingfield J.C. 2007 Distinguishing seasonal androgen responses from male-male androgen responsiveness—revisiting the challenge hypothesis. *Horm Behav* **51**(4), 463-476.
65. Wingfield J.C., Soma K.K. 2002 Spring and autumn territoriality in song sparrows: same behavior, different mechanisms? *Integr Comp Biol* **42**(1), 11-20.
66. Mills S.C., Hazard L., Lancaster L., Mappes T., Miles D., Oksanen T.A., Sinervo B. 2008 Gonadotropin hormone modulation of testosterone, immune function, performance, and behavioral trade-offs among male morphs of the lizard *Uta stansburiana*. *The American Naturalist* **171**(3), 339-357.

67. Ketterson E.D., Nolan Jr V., Wolf L., Ziegenfus C., Dufty Jr A.M., Ball G.F., Johnsen T.S. 1991 Testosterone and avian life histories: the effect of experimentally elevated testosterone on corticosterone and body mass in dark-eyed juncos. *Horm Behav* **25**(4), 489-503.
68. Ashcroft G.S., Mills S.J. 2002 Androgen receptor-mediated inhibition of cutaneous wound healing. *The Journal of clinical investigation* **110**(5), 615-624.
69. De Jong B., Lens L., Amininasab S.M., van Oers K., Darras V.M., Eens M., Pinxten R., Komdeur J., Groothuis T.G.G. 2016 Effects of experimentally sustained elevated testosterone on incubation behaviour and reproductive success in female great tits (*Parus major*). *Gen Comp Endocrinol* **230**, 38-47.
70. Marler C.A., Moore M.C. 1988 Evolutionary costs of aggression revealed by testosterone manipulations in free-living male lizards. *Behav Ecol Sociobiol* **23**(1), 21-26.
71. Martínez-Padilla J., Pérez-Rodríguez L., Mougeot F., Ludwig S.C., Redpath S.M. 2014 Experimentally elevated levels of testosterone at independence reduce fitness in a territorial bird. *Ecology* **95**(4), 1033-1044.
72. Wingfield J.C., Lynn S.E., Soma K.K. 2001 Avoiding the 'costs' of testosterone: ecological bases of hormone-behavior interactions. *Brain Behav Evol* **57**(5), 239-251.
73. Schlinger B.A., Paul K., Monks D.A. 2018 Muscle, a conduit to brain for hormonal control of behavior. *Horm Behav* **105**, 58-65.
74. Alexander G.M., Sherwin B.B. 1991 The association between testosterone, sexual arousal, and selective attention for erotic stimuli in men. *Horm Behav* **25**(3), 367-381.
75. Fuxjager M.J., Lee J.-H., Chan T.-M., Bahn J.H., Chew J.G., Xiao X., Schlinger B.A. 2016 Research resource: hormones, genes, and athleticism: effect of androgens on the avian muscular transcriptome. *Mol Endocrinol* **30**(2), 254-271.
76. Caraguel C.G.B., Stryhn H., Gagné N., Dohoo I.R., Hammell K.L. 2011 Selection of a cutoff value for real-time polymerase chain reaction results to fit a diagnostic purpose: analytical and epidemiologic approaches. *J Vet Diagn Invest* **23**(1), 2-15.



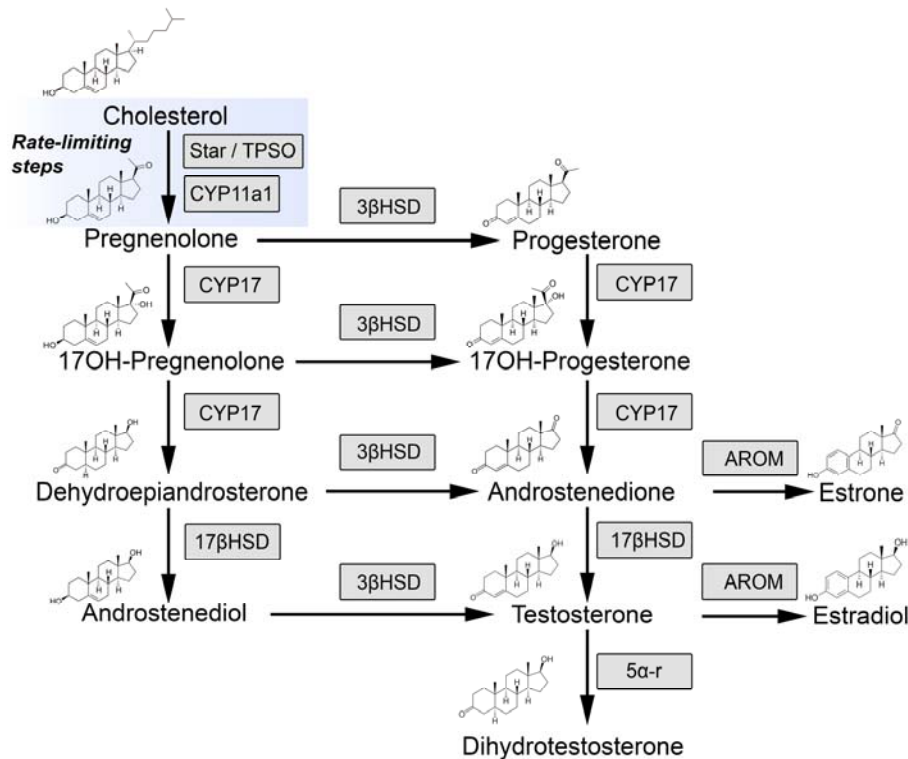

**Figure 1.** Pathway that outlines the multi-step conversion of cholesterol to androgenic (red box) and estrogenic (green box) hormones. The rate limiting proteins in *de novo* steroid synthesis (blue box) play an important role in the initial transport (steroidogenic acute regulator protein [StAR] and translocator protein [TPSO]) and the subsequent enzymatic conversion (cyp11a1) of cholesterol to pregnenolone. Other enzymes responsible for the conversion of this hormone to other steroid metabolites, including androgens (17β-hydroxysteroid dehydrogenase [17BHSD] and 3-oxo-5α-steroid 4-dehydrogenases [5α-r]) and estrogens (Aromatase [AROM]). The latter (AROM) is also important because it act through intracellular estrogen receptor, which are not specialized in muscles that participate in sexual signaling [18]. All enzymes are highlighted in grey rectangles.

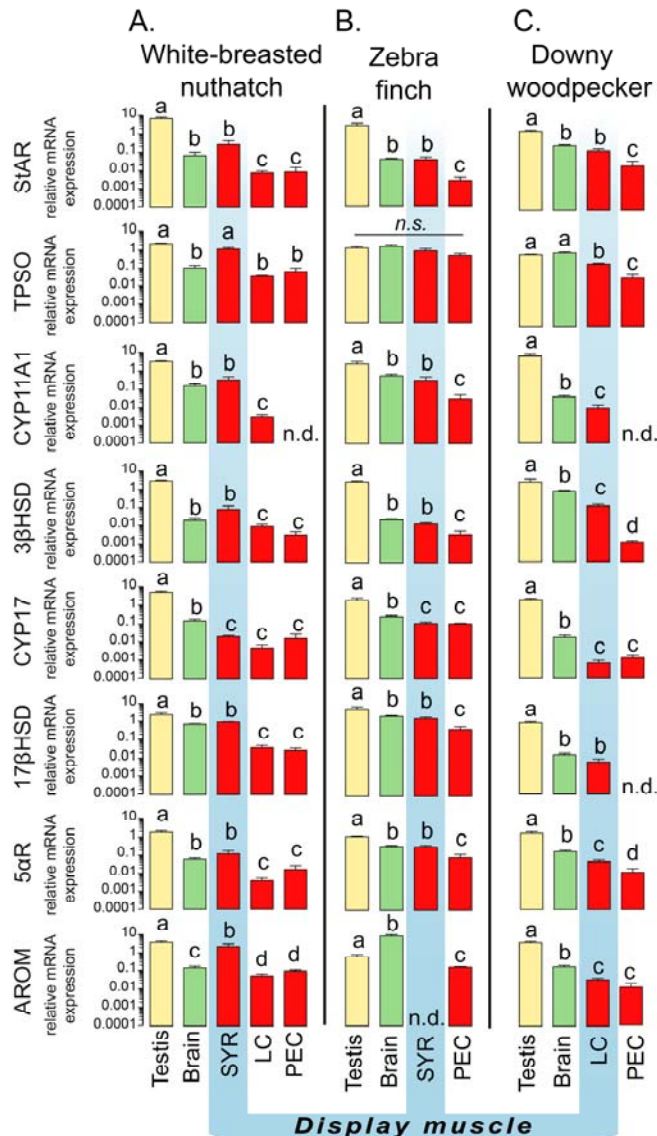

**Figure 2.** Expression of steroidogenic enzymes in the testis (yellow), brain (green) and skeletal muscle (red) of the downy woodpecker, zebra finch, and white-breasted nuthatch. Display muscles (e.g. the *longus colli ventralis* (LC) and *syrinx* (SYR) are highlighted with a blue line. For all species, the non-display muscle was the *pectoralis* (PEC). Bars represent mean relative mRNA expression (gene interest/GAPDH)  $\pm$  SEM. Letters denote *post hoc* significant differences ( $p < 0.05$ ) between tissues. Non-detectable transcripts are denoted as 'nd,' indicating a failure to detect any amplification after 40 cycles. The only exception to this was expression of *cyp11a1* listed as n.d. for the white-breasted nuthatch PEC. The Ct was  $\approx 37$ , which is greater than threshold we used to determine functional "detectability" with confidence [76].

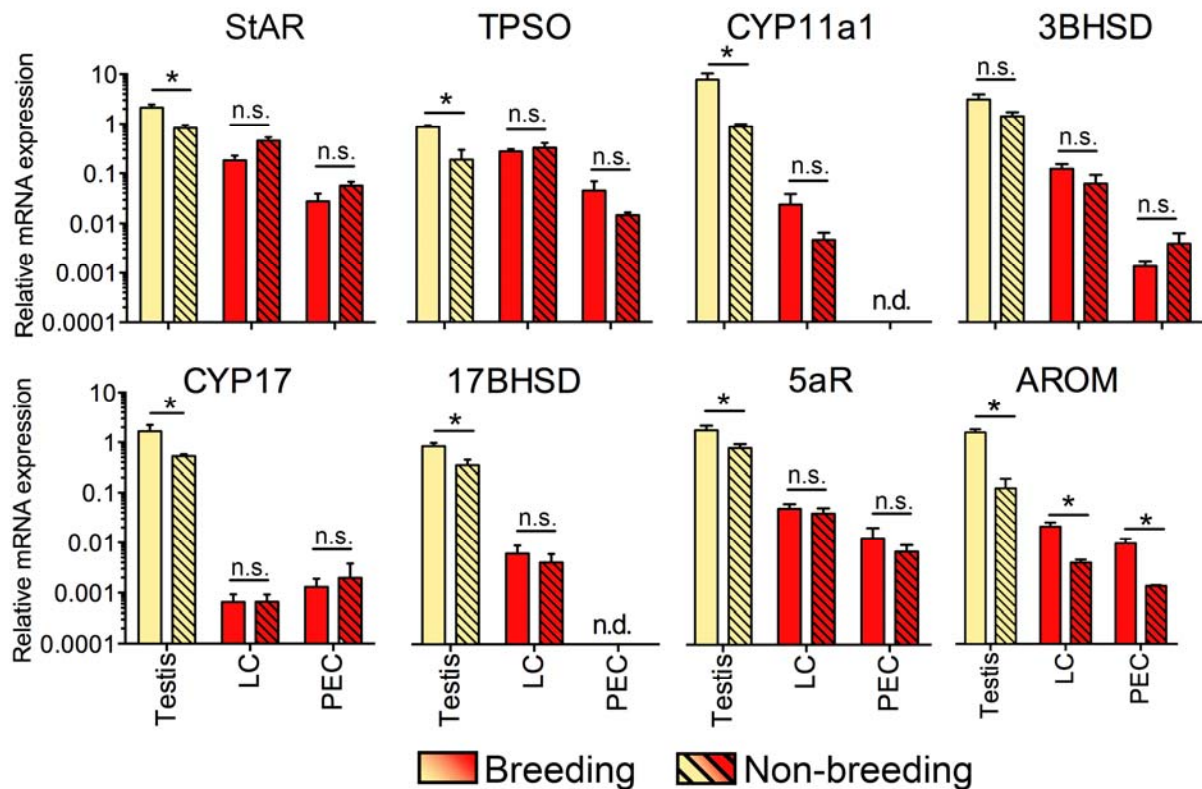

**Figure 3.** Expression of steroidogenic enzymes in the testis, *longus colli ventralis* (LC), and *pectoralis* (PEC) of breeding (solid bars) and non-breeding (hashed bars) male downy woodpeckers. Bars represent mean  $\pm$ SEM. Asterisks denote significant differences ( $p < 0.05$ ) between the breeding and non-breeding season. n.s. denotes comparisons that did not significantly differ from each other.

**Table 1** Summary of linear mixed models used to assess tissue differences in steroidogenic enzyme expression in male zebra finches, white-breasted nuthatches, and downy woodpeckers

|                                | <b>STAR</b>                          | <b>TPSO</b>                            | <b>Cyp11a1</b>                       | <b>3BHSD</b>                            | <b>Cyp17</b>                         | <b>17BHSD</b>                        | <b>5aR</b>                               | <b>AROM</b>                          |
|--------------------------------|--------------------------------------|----------------------------------------|--------------------------------------|-----------------------------------------|--------------------------------------|--------------------------------------|------------------------------------------|--------------------------------------|
| <b>Zebra finch</b>             | F <sub>3,10</sub> =62.40,<br>p<0.001 | F <sub>3,10</sub> =3.32,<br>p=0.07     | F <sub>3,10</sub> =8.64,<br>p<0.01   | F <sub>3,10</sub> =74.84,<br>p<0.001    | F <sub>3,10</sub> =31.18,<br>p<0.001 | F <sub>3,10</sub> =8.34,<br>p<0.01   | F <sub>3,10</sub> =17.14,<br>p<0.001     | F <sub>3,10</sub> =59.85,<br>p<0.001 |
| <b>White-breasted nuthatch</b> | F <sub>4,12</sub> =22.64,<br>p<0.001 | F <sub>4,10</sub> =26.79,<br>p<0.001   | F <sub>4,11</sub> =27.07,<br>p<0.001 | F <sub>4,11</sub> =48.23,<br>p<0.001    | F <sub>4,11</sub> =21.03,<br>p<0.001 | F <sub>4,11</sub> =68.12,<br>p<0.001 | F <sub>4,12</sub> =26.30,<br>p<0.001     | F <sub>4,12</sub> =33.04,<br>p<0.001 |
| <b>Downy woodpecker</b>        | F <sub>3,10</sub> =33.62,<br>p<0.001 | F <sub>3,7.13</sub> =27.89,<br>p<0.001 | F <sub>3,10</sub> =7.33,<br>p<0.01   | F <sub>3,7.57</sub> =217.71,<br>p<0.001 | F <sub>3,10</sub> =58.01,<br>p<0.001 | F <sub>3,7</sub> =80.77,<br>p<0.001  | F <sub>3,7.88</sub> = 104.66,<br>p<0.001 | F <sub>3,10</sub> =22.38,<br>p<0.001 |

\* denote significant differences after FDR correction for multiple tests

**Table 2** Summary of t-tests used to examine how steroidogenic enzyme expression changes in the testis, LC muscle, and PEC muscle of male downy woodpeckers across seasons

|               | <b>STAR</b>               | <b>TPSO</b>               | <b>Cyp11a1</b>            | <b>3BHSD</b>              | <b>Cyp17</b>              | <b>17BHSD</b>             | <b>5aR</b>                | <b>AROM</b>                |
|---------------|---------------------------|---------------------------|---------------------------|---------------------------|---------------------------|---------------------------|---------------------------|----------------------------|
| <b>Testis</b> | t(5) = 4.29,<br>p < 0.01* | t(5) = 3.30,<br>p = 0.04* | t(5) = 6.28,<br>p < 0.01* | t(5) = 2.16,<br>p = 0.09  | t(5) = 7.27,<br>p < 0.01* | t(5) = 5.84,<br>p < 0.01* | t(5) = 2.86,<br>p = 0.05  | t(5) = 6.29,<br>p < 0.01   |
| <b>LC</b>     | t(7) = -2.39,<br>p = 0.07 | t(7) = -0.48,<br>p = 0.65 | t(7) = 1.28, p = 0.25     | t(7) = 1.61, p = 0.17     | t(7) = -0.28,<br>p = 0.79 | t(7) = 0.83,<br>p = 0.44  | t(7) = 0.55,<br>p = 0.61  | t(7) = 5.53,<br>p < 0.01 * |
| <b>PEC</b>    | t(7) = -1.80,<br>p = 0.13 | t(7) = 1.22,<br>p = 0.27  | n.d.                      | t(7) = -1.32,<br>p = 0.24 | t(7) = 0.52,<br>p = 0.63  | n.d.                      | t(7) = -0.45,<br>p = 0.67 | t(7) = 3.78,<br>p < 0.01 * |

\* denote significant differences after FDR correction for multiple tests

n.d. denotes transcripts that were not detectable in a particular tissue
